# Supplementary material for: Aerobic cross-dehydrogenative coupling of toluenes and o-phenylenediamines by flavin photocatalysis for the facile synthesis of benzimidazoles
Source: Royal Society of Chemistry journal article supplement (doi:10.1039/d3ob00113j), 2023-01-01
Supplement: d3ob00113j1.pdf [file d3ob00113j1.pdf]

Supplementary Information

**Aerobic Cross-Dehydrogenative Coupling of Toluenes and *o*-Phenylenediamines by Flavin Photocatalysis for Facile Synthesis of Benzimidazoles**

Yuta Shiogai, Marina Oka, Hiroki Iida\*

Department of Chemistry, Graduate School of Natural Science and Technology,  
Shimane University, 1060 Nishikawatsu, Matsue, 690-8504, Japan

E-mail address: [iida@riko.shimane-u.ac.jp](mailto:iida@riko.shimane-u.ac.jp)

|                                                                                       |     |
|---------------------------------------------------------------------------------------|-----|
| 1. General                                                                            | S2  |
| 2. Materials                                                                          | S2  |
| 3. Experimental Procedures                                                            | S2  |
| 4. Optimization of Reaction Conditions                                                | S10 |
| 5. ESI-MS Analysis of Reaction Mixture                                                | S11 |
| 6. <sup>1</sup> H and <sup>13</sup> C{ <sup>1</sup> H} NMR Spectra of Novel Compounds | S13 |
| 7. <sup>1</sup> H NMR Spectra of Known Compounds                                      | S23 |
| 8. References                                                                         | S26 |

## 1. General

The IR spectra were recorded on a JASCO FT/IR-660plus spectrophotometer (JASCO, Tokyo, Japan). The NMR spectra were measured using JEOL JNM-L400 and JNM ECX-500 spectrometers (JEOL, Akishima, Japan) operating at 400 and 500 MHz, respectively, for  $^1\text{H}$  and 100 and 126 MHz, respectively, for  $^{13}\text{C}$  using tetramethylsilane (TMS) or a solvent residual peak as the internal standard. The electrospray ionization mass (ESI-MS) spectra were recorded on a Bruker microTOFII mass spectrometer (Bruker, Billerica, MA) using the positive or negative mode ESI-TOF method for acetonitrile solutions and sodium formate as the reference. The GC measurements were performed on a Shimadzu GC-2014 gas chromatograph (Shimadzu, Kyoto, Japan) equipped with a flame ionization detector (FID) using a Supelco Equity-5 (30 m x 0.25 mm) column.

## 2. Materials

Riboflavin tetraacetate (**4a**),<sup>S1</sup> 1,3-dimethylalloxazine (**5a**),<sup>S2</sup> 7-trifluoromethyl-1,3-dimethylalloxazine (**5b**),<sup>S2</sup> 5-ethyl-10-(2-hydroxyethyl)-7,8-dimethylisoalloxazinium triflate (**6•TfO**),<sup>S3</sup> 5-ethyl-1,3,7,8-tetramethylalloxazinium triflate (**7•TfO**),<sup>S3</sup> and 1,10-ethylene-3,7,8-trimethylisoalloxazinium triflate (**8•TfO**),<sup>S3</sup> were synthesized according to the previously reported methods. 1-Methyl-4-phenoxybenzene (**1c**) and 4-methyl-*N*-phenylbenzene-1,2-diamine (**2f**) were synthesized according to the previously reported methods.<sup>S4,5</sup> Other starting materials were purchased from Sigma-Aldrich (St. Louis, USA), FUJIFILM Wako Pure Chemical Corporation (Osaka, Japan), Nacalai tesque (Kyoto, Japan), and Tokyo Kasei (TCI, Tokyo, Japan) and were used as received.

## 3. Experimental Procedures

**Typical procedure for synthesis of 3aa.** A mixture of 4-methoxytoluene (**1a**, 122 mg, 1.0 mmol), **4a** (13.6 mg, 0.025 mmol), MeOH (12.5 mL), and H<sub>2</sub>O (12.5 mL) was irradiated using blue LED lamps (11 W) while stirring under air (1 atm, balloon) at 25 °C for 6 h. A solution of 2-aminodiphenylamine (**2a**, 92.1 mg, 0.50 mmol) in MeOH (25 mL) was then

added into the reaction mixture, and the mixture was stirred under irradiation at 60 °C for 15 h. After the solvent was removed by evaporation, the residue was purified by column chromatography (SiO<sub>2</sub>, hexane/ethyl acetate = 4/1, v/v) to give **3aa** (120 mg, 80%) as a white solid. These results are summarized in Scheme 3.

#### Spectroscopic data of benzimidazoles

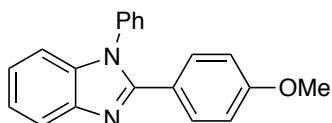

Spectroscopic data of 2-(4-methoxyphenyl)-1-phenyl-1*H*-benz[*d*]imidazole (**3aa**):<sup>S6</sup> Column chromatography (SiO<sub>2</sub>, hexane/ethyl acetate=4/1, v/v) afforded the desired product (120 mg, 80%) as a white solid. <sup>1</sup>H NMR (500 MHz, CDCl<sub>3</sub>, 25 °C, δ): 7.86 (d, *J* = 8.1 Hz, 1H), 7.52-7.42 (m, 5H), 7.33-7.28 (m, 3H), 7.24-7.18 (m, 2H), 6.81 (dt, *J* = 8.9, 2.5 Hz, 2H), 3.78 (s, 3H). <sup>13</sup>C{<sup>1</sup>H} NMR (126 MHz, CDCl<sub>3</sub>, 25 °C, δ): 160.6, 152.5, 143.1, 137.30, 137.26, 131.0, 129.9, 128.6, 127.5, 123.1, 122.9, 122.4, 119.6, 113.8, 110.4, 55.3.

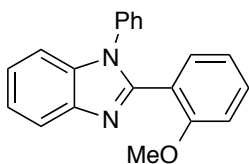

Spectroscopic data of 2-(2-methoxyphenyl)-1-phenyl-1*H*-benz[*d*]imidazole (**3ba**): Column chromatography (SiO<sub>2</sub>, hexane/ethyl acetate=9/1 to 3/1, v/v) afforded the desired product (58.9 mg, 60%) as a white solid. Mp: 153.1-154.4 °C. IR (KBr, cm<sup>-1</sup>): 3049, 2834, 1260, 1032. <sup>1</sup>H NMR (500 MHz, CDCl<sub>3</sub>, 25 °C, δ): 7.89 (d, *J* = 8.0 Hz, 1H), 7.66 (dd, *J* = 7.6, 1.7 Hz, 1H), 7.39-7.21 (m, 9H), 7.03 (td, *J* = 7.5, 0.9 Hz, 1H), 6.72 (d, *J* = 8.1 Hz, 1H), 3.31 (s, 3H). <sup>13</sup>C{<sup>1</sup>H} NMR (126 MHz, CDCl<sub>3</sub>, 25 °C, δ): 157.0, 151.4, 143.3, 137.4, 136.1, 132.3, 131.5, 129.1, 127.7, 126.0, 123.2, 122.6, 120.8, 120.1, 120.0, 110.9, 110.4, 54.8. HRMS (ESI-TOF) *m/z*: [M+H]<sup>+</sup> calcd for C<sub>20</sub>H<sub>17</sub>N<sub>2</sub>O, 301.1335; found, 301.1339.

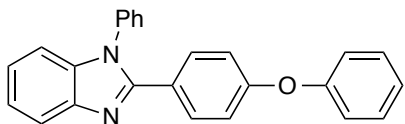

Spectroscopic data of 2-(4-phenoxyphenyl)-1-phenyl-1*H*-benz[*d*]imidazole (**3ca**): Column chromatography (SiO<sub>2</sub>, hexane/ethyl acetate=9/1 to 4:1, v/v) afforded the desired product (85.3 mg, 72%) as a white solid. Mp: 148.2-150.3 °C. IR (KBr, cm<sup>-1</sup>): 3060, 3015, 1241. <sup>1</sup>H NMR (500 MHz, CDCl<sub>3</sub>, 25 °C, δ): 7.87 (d, *J* = 8.0 Hz, 1H), 7.55-7.43 (m, 5H), 7.36-7.29 (m, 5H), 7.26-7.20 (m, 2H), 7.13 (t, *J* = 7.4 Hz, 1H), 7.02 (dd, *J* = 8.7, 1.1 Hz, 2H), 6.90 (dt, *J* = 8.8, 2.4 Hz, 2H). <sup>13</sup>C{<sup>1</sup>H} NMR (126 MHz, CDCl<sub>3</sub>, 25 °C, δ): 158.8, 156.2, 152.1, 143.1, 137.4, 137.1, 131.1, 130.03, 129.99, 128.7, 127.6, 124.6, 124.1, 123.3, 123.1, 119.8, 118.0, 110.5. HRMS (ESI-TOF) *m/z*: [M+H]<sup>+</sup> calcd for C<sub>25</sub>H<sub>19</sub>N<sub>2</sub>O, 363.1492; found, 363.1500.

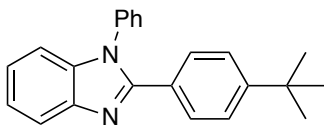

Spectroscopic data of 2-(4-(*tert*-butyl)phenyl)-1-phenyl-1*H*-benz[*d*]imidazole (**3da**):<sup>S7</sup> Column chromatography (SiO<sub>2</sub>, hexane/ethyl acetate=9/1 to 4:1, v/v) afforded the desired product (38.8 mg, 36%) as a white solid. <sup>1</sup>H NMR (500 MHz, CDCl<sub>3</sub>, 25 °C, δ): 7.88 (d, *J* = 8.0 Hz, 1H), 7.53-7.47 (m, 5H), 7.34-7.29 (m, 5H), 7.24-7.20 (m, 2H), 1.29 (s, 9H). <sup>13</sup>C{<sup>1</sup>H} NMR (126 MHz, CDCl<sub>3</sub>, 25 °C, δ): 152.8, 152.6, 143.2, 137.5, 137.3, 130.0, 129.2, 128.7, 127.7, 127.1, 125.4, 123.2, 123.0, 119.8, 110.5, 34.9, 31.3.

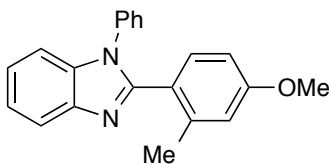

Spectroscopic data of 2-(4-methoxy-2-methylphenyl)-1-phenyl-1*H*-benz[*d*]imidazole (**3ga**): Column chromatography (SiO<sub>2</sub>, hexane/ethyl acetate= 4:1, v/v) afforded the desired product (69.4 mg, 67%) as a white solid. Mp: 144.2-145.8 °C. IR (KBr, cm<sup>-1</sup>): 3053, 2954,

1242, 1046.  $^1\text{H}$  NMR (500 MHz,  $\text{CDCl}_3$ , 25  $^\circ\text{C}$ ,  $\delta$ ): 7.88 (d,  $J = 7.9$  Hz, 1H), 7.39-7.24 (m, 6H), 7.21-7.18 (m, 3H), 6.69 (d,  $J = 2.6$  Hz, 1H), 6.66 (dd,  $J = 8.4, 2.6$  Hz, 1H), 3.76 (s, 3H), 2.17 (s, 3H).  $^{13}\text{C}\{^1\text{H}\}$  NMR (126 MHz,  $\text{CDCl}_3$ , 25  $^\circ\text{C}$ ,  $\delta$ ): 160.4, 153.1, 143.2, 139.6, 136.6, 135.8, 132.3, 129.5, 127.9, 126.7, 123.1, 122.8, 122.7, 120.0, 115.7, 111.1, 110.5, 55.2, 20.4. HRMS (ESI-TOF)  $m/z$ :  $[\text{M}+\text{H}]^+$  calcd for  $\text{C}_{21}\text{H}_{19}\text{N}_2\text{O}$ , 315.1492; found, 315.1498.

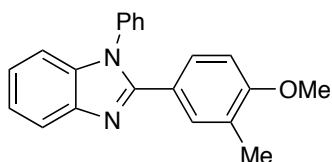

Spectroscopic data of 2-(4-methoxy-3-methylphenyl)-1-phenyl-1*H*-benz[*d*]imidazole (**3ha**): Column chromatography ( $\text{SiO}_2$ , hexane/ethyl acetate= 4:1, v/v) afforded the desired product (75.2 mg, 73%) as a pale pink solid. Mp: 136.6-138.9  $^\circ\text{C}$ . IR (KBr,  $\text{cm}^{-1}$ ) 3052, 2987, 1250, 1031.  $^1\text{H}$  NMR (500 MHz,  $\text{CDCl}_3$ , 25  $^\circ\text{C}$ ,  $\delta$ ): 7.86 (d,  $J = 8.0$  Hz, 1H), 7.53-7.47 (m, 4H), 7.34-7.30 (m, 3H), 7.25-7.19 (m, 3H), 6.68 (d,  $J = 8.4$  Hz, 1H), 3.80 (s, 3H), 2.15 (s, 3H).  $^{13}\text{C}\{^1\text{H}\}$  NMR (126 MHz,  $\text{CDCl}_3$ , 25  $^\circ\text{C}$ ,  $\delta$ ): 158.9, 152.7, 143.1, 137.44, 137.37, 132.0, 129.9, 128.6, 128.3, 127.7, 126.9, 123.0, 122.9, 121.9, 119.6, 110.4, 109.4, 55.4, 16.2. HRMS (ESI-TOF)  $m/z$ :  $[\text{M}+\text{H}]^+$  calcd for  $\text{C}_{21}\text{H}_{19}\text{N}_2\text{O}$ , 315.1492; found, 315.1498.

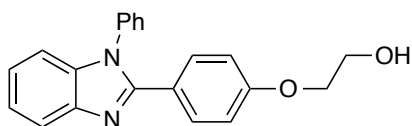

Spectroscopic data of 2-(4-(2-hydroxy)ethoxyphenyl)-1-phenyl-1*H*-benz[*d*]imidazole (**3ia**): Column chromatography ( $\text{SiO}_2$ , hexane/ethyl acetate= 4:1 to 1:1, v/v) afforded the desired product (65.3 mg, 66%) as a white solid. Mp: 179.4-181.9  $^\circ\text{C}$ . IR (KBr,  $\text{cm}^{-1}$ ): 3292, 2947, 2858, 1254, 1055.  $^1\text{H}$  NMR (500 MHz,  $\text{CDCl}_3$ , 25  $^\circ\text{C}$ ,  $\delta$ ): 7.86 (d,  $J = 8.0$  Hz, 1H), 7.52-7.43 (m, 5H), 7.34-7.28 (m, 3H), 7.26-7.20 (m, 2H), 6.79 (dt,  $J = 9.0, 2.5$  Hz, 2H), 4.02 (t,  $J = 4.6$  Hz, 2H), 3.94 (t,  $J = 4.6$  Hz, 2H), 2.99 (br, s, 1H).  $^{13}\text{C}\{^1\text{H}\}$  NMR (126 MHz,  $\text{CDCl}_3$ , 25  $^\circ\text{C}$ ,  $\delta$ ): 158.8, 151.4, 142.0, 136.3, 136.2, 130.1, 129.0, 127.7, 126.6, 122.2,

122.1, 121.7, 118.6, 113.5, 109.5, 68.4, 60.3. HRMS (ESI-TOF)  $m/z$ :  $[M+H]^+$  calcd for  $C_{21}H_{19}N_2O_2$ , 331.1455; found, 331.1441.

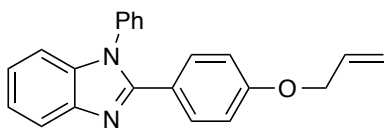

Spectroscopic data of 2-(4-(allyloxy)phenyl)-1-phenyl-1*H*-benz[*d*]imidazole (**3ja**): Column chromatography ( $SiO_2$ , hexane/ethyl acetate= 4:1, v/v) afforded the desired product (103 mg, 63%) as a colorless oil. IR (neat,  $cm^{-1}$ ): 3063, 2985, 1650, 1178, 1074, 1015.  $^1H$  NMR (500 MHz,  $CDCl_3$ , 25 °C,  $\delta$ ): 7.86 (d,  $J = 8.0$  Hz, 1H), 7.52-7.43 (m, 5H), 7.33-7.29 (m, 3H), 7.25-7.19 (m, 2H), 6.82 (dt,  $J = 9.0, 2.5$  Hz, 2H), 6.02 (ddt,  $J = 17.3, 10.4, 5.2$  Hz, 1H), 5.39 (ddd,  $J = 17.3, 3.1, 1.6$  Hz, 1H), 5.27 (ddd,  $J = 10.6, 2.7, 1.3$  Hz, 1H), 4.52 (t,  $J = 1.5$  Hz, 1H), 4.51 (t,  $J = 1.5$  Hz, 1H).  $^{13}C\{^1H\}$  NMR (126 MHz,  $CDCl_3$ , 25 °C,  $\delta$ ): 159.7, 152.5, 143.1, 137.32, 137.28, 132.9, 131.0, 130.0, 128.6, 127.6, 123.1, 123.0, 122.6, 119.7, 118.0, 114.6, 110.4, 68.9. HRMS (ESI-TOF)  $m/z$ :  $[M+H]^+$  calcd for  $C_{22}H_{19}N_2O$ , 327.1492; found, 327.1508.

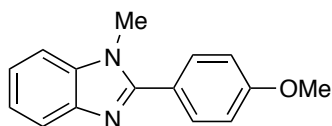

Spectroscopic data of 2-(4-methoxyphenyl)-1-methyl-1*H*-benz[*d*]imidazole (**3ab**):<sup>S8</sup> Column chromatography ( $SiO_2$ , hexane/ethyl acetate=3/1, v/v) afforded the desired product (90.3 mg, 76%) as a white solid.  $^1H$  NMR (500 MHz,  $CDCl_3$ , 25 °C,  $\delta$ ): 7.82-7.79 (m, 1H), 7.69 (dt,  $J = 8.5, 2.5$  Hz, 2H), 7.35-7.26 (m, 3H), 7.02 (dt,  $J = 8.5, 2.5$  Hz, 2H), 3.85 (s, 3H), 3.80 (s, 3H).  $^{13}C\{^1H\}$  NMR (126 MHz,  $CDCl_3$ , 25 °C,  $\delta$ ): 160.8, 153.8, 143.0, 136.6, 130.9, 122.6, 122.5, 122.3, 119.6, 114.2, 109.6, 55.4, 31.7.

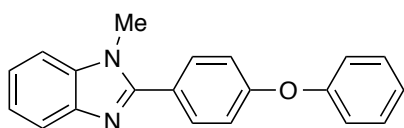

Spectroscopic data of 1-methyl-2-(4-phenoxyphenyl)-1*H*-benz[*d*]imidazole (**3cb**): Column chromatography (SiO<sub>2</sub>, hexane/ethyl acetate= 4:1, v/v) afforded the desired product (66.9 mg, 66%) as a white solid. Mp: 129.8-131.2 °C. IR (KBr, cm<sup>-1</sup>): 3041, 2946, 1237. <sup>1</sup>H NMR (500 MHz, CDCl<sub>3</sub>, 25 °C, δ): 7.83-7.80 (m, 1H), 7.74 (dt, *J* = 8.7, 2.5 Hz, 2H), 7.41-7.36 (m, 3H), 7.34-7.28 (m, 2H), 7.17 (t, *J* = 7.4 Hz, 1H), 7.13 (dt, *J* = 8.7, 2.5 Hz, 2H), 7.10 (m, 2H), 3.87 (s, 3H). <sup>13</sup>C{<sup>1</sup>H} NMR (126 MHz, CDCl<sub>3</sub>, 25 °C, δ): 159.1, 156.4, 153.5, 143.1, 136.7, 131.2, 130.1, 125.0, 124.2, 122.8, 122.6, 119.9, 119.7, 118.5, 109.7, 31.8. HRMS (ESI-TOF) *m/z*: [M+H]<sup>+</sup> calcd for C<sub>20</sub>H<sub>17</sub>N<sub>2</sub>O, 301.1335; found, 301.1338.

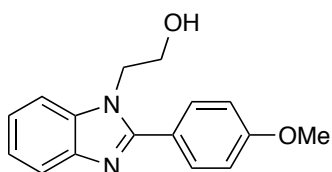

Spectroscopic data of 1-(2-hydroxyethyl)-2-(4-methoxyphenyl)-1*H*-benz[*d*]imidazole (**3ac**): Column chromatography (SiO<sub>2</sub>, hexane/ethyl acetate= 2:1, v/v) afforded the desired product (57.6 mg, 65%) as a white solid. Mp: 134.5-135.7 °C. IR (KBr, cm<sup>-1</sup>): 3160, 2935, 2837, 1255, 1026. <sup>1</sup>H NMR (500 MHz, CDCl<sub>3</sub>, 25 °C, δ): 7.66 (dt, *J* = 8.9, 2.5 Hz, 2H), 7.33 (d, *J* = 7.8 Hz, 1H), 7.20 (d, *J* = 8.0 Hz, 1H), 7.08 (td, *J* = 7.6, 1.1 Hz, 1H), 7.01 (td, *J* = 7.6, 1.0 Hz, 1H), 6.77 (dt, *J* = 8.9, 2.6 Hz, 2H), 4.23 (t, *J* = 5.3 Hz, 2H), 4.10 (t, *J* = 5.3 Hz, 2H), 3.80 (s, 3H). <sup>13</sup>C{<sup>1</sup>H} NMR (126 MHz, CDCl<sub>3</sub>, 25 °C, δ): 160.6, 154.1, 142.2, 135.1, 131.5, 122.6, 122.5, 121.9, 118.9, 113.9, 110.0, 60.5, 55.3, 47.1. HRMS (ESI-TOF) *m/z*: [M+H]<sup>+</sup> calcd for C<sub>16</sub>H<sub>17</sub>N<sub>2</sub>O<sub>2</sub>, 269.1285; found, 269.1287.

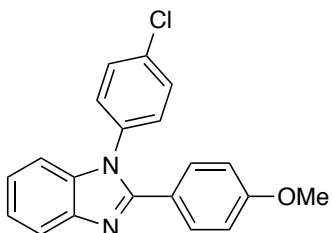

Spectroscopic data of 1-(4-chlorophenyl)-2-(4-methoxyphenyl)-1*H*-benz[*d*]imidazole (**3ad**):<sup>S9</sup> Column chromatography (SiO<sub>2</sub>, hexane/ethyl acetate=4/1, v/v) afforded the desired

product (72.9 mg, 66%) as a white solid.  $^1\text{H}$  NMR (500 MHz,  $\text{CDCl}_3$ , 25  $^\circ\text{C}$ ,  $\delta$ ): 7.86 (d,  $J$  = 8.0 Hz, 1H), 7.51-7.46 (m, 4H), 7.35-7.31 (m, 1H), 7.28-7.22 (m, 3H), 7.20 (d,  $J$  = 8.1 Hz, 1H), 6.85 (dt,  $J$  = 8.8, 2.5 Hz, 2H), 3.82 (s, 3H).  $^{13}\text{C}\{^1\text{H}\}$  NMR (126 MHz,  $\text{CDCl}_3$ , 25  $^\circ\text{C}$ ,  $\delta$ ): 160.8, 152.4, 143.2, 137.0, 135.8, 134.4, 131.0, 130.3, 128.8, 123.3, 123.2, 122.1, 119.8, 114.0, 110.2, 55.4.

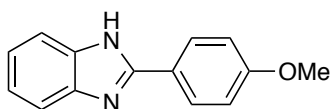

Spectroscopic data of 2-(4-methoxyphenyl)-1*H*-benz[*d*]imidazole (**3ae**):<sup>S10</sup> Column chromatography ( $\text{SiO}_2$ , hexane/ethyl acetate=3/1, v/v) afforded the desired product (76.7 mg, 77%) as a white solid.  $^1\text{H}$  NMR (500 MHz,  $\text{DMSO-d}_6$ , 25  $^\circ\text{C}$ ,  $\delta$ ): 12.7 (br s, 1H), 8.13 (dt,  $J$  = 8.9, 2.5 Hz, 2H), 7.62 (d,  $J$  = 6.0 Hz, 1H), 7.50 (d,  $J$  = 5.5 Hz, 1H), 7.17 (d,  $J$  = 4.3 Hz, 2H), 7.11 (dt,  $J$  = 8.9, 2.5 Hz, 2H), 3.84 (s, 3H).  $^{13}\text{C}\{^1\text{H}\}$  NMR (126 MHz,  $\text{CDCl}_3$ , 25  $^\circ\text{C}$ ,  $\delta$ ): 160.6, 151.4, 143.9, 135.0, 128.0, 122.7, 122.1, 121.5, 118.5, 114.4, 110.0, 55.3.

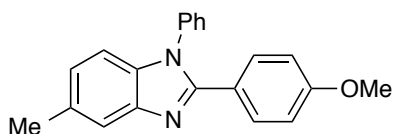

Spectroscopic data of 2-(4-methoxyphenyl)-5-methyl-1-phenyl-1*H*-benz[*d*]imidazole (**3af**): Column chromatography ( $\text{SiO}_2$ , hexane/ethyl acetate=4/1, v/v) afforded the desired product (80.8 mg, 78%) as a white solid. Mp: 141.6-143.2  $^\circ\text{C}$ . IR (KBr,  $\text{cm}^{-1}$ ): 3006, 2839, 1254, 1028.  $^1\text{H}$  NMR (500 MHz,  $\text{CDCl}_3$ , 25  $^\circ\text{C}$ ,  $\delta$ ): 7.64 (s, 1H), 7.50-7.40 (m, 5H), 7.28 (dt,  $J$  = 7.0, 1.6 Hz, 2H), 7.09 (d,  $J$  = 8.3 Hz, 1H), 7.04 (dd,  $J$  = 8.2, 1.1 Hz, 1H), 6.80 (dt,  $J$  = 8.9, 2.5 Hz, 2H), 3.78 (s, 3H), 2.50 (s, 3H).  $^{13}\text{C}\{^1\text{H}\}$  NMR (126 MHz,  $\text{CDCl}_3$ , 25  $^\circ\text{C}$ ,  $\delta$ ): 160.5, 152.4, 143.4, 137.4, 135.5, 132.6, 130.9, 129.9, 128.4, 127.5, 124.5, 122.6, 119.4, 113.8, 109.9, 55.3, 21.7. HRMS (ESI-TOF)  $m/z$ :  $[\text{M}+\text{H}]^+$  calcd for  $\text{C}_{21}\text{H}_{19}\text{N}_2\text{O}$ , 315.1500; found, 315.1492.



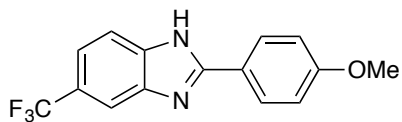

Spectroscopic data of 2-(4-methoxyphenyl)-5-trifluoromethyl-1*H*-benz[*d*]imidazole (**3ag**):<sup>S11</sup> Column chromatography (SiO<sub>2</sub>, hexane/ethyl acetate=1/5, v/v) afforded the desired product (70.3 mg, 74%) as a white solid. <sup>1</sup>H NMR (500 MHz, CDCl<sub>3</sub>, 25 °C,  $\delta$ ): 8.10 (dt,  $J = 8.9, 2.4$  Hz, 2H), 7.78 (s, 1H), 7.58 (d,  $J = 8.3$  Hz, 1H), 7.43 (dd,  $J = 8.7, 1.5$  Hz, 1H), 6.91 (dt,  $J = 8.9, 2.5$  Hz, 2H), 3.80 (s, 3H). <sup>13</sup>C{<sup>1</sup>H} NMR (126 MHz, CDCl<sub>3</sub>, 25 °C,  $\delta$ ): 161.8, 154.6, 128.7, 125.0 (q,  $J = 32$  Hz), 124.9 (q,  $J = 273$  Hz), 121.9, 119.7, 114.7, 55.5. HRMS (ESI-TOF)  $m/z$ : [M+H]<sup>+</sup> calcd for C<sub>15</sub>H<sub>12</sub>F<sub>3</sub>N<sub>2</sub>O, 293.0896; found, 293.0894.

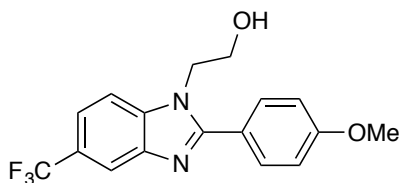

Spectroscopic data of 1-(2-hydroxyethyl)-2-(4-methoxyphenyl)-5-trifluoromethyl-1*H*-benz[*d*]imidazole (**3ah**): Column chromatography (SiO<sub>2</sub>, hexane/ethyl acetate=2/1, v/v) afforded the desired product (66.2 mg, 60%) as a white solid. Mp: 148.1-149.6 °C. IR (KBr, cm<sup>-1</sup>): 3180, 3016, 2846, 1610, 1338, 1327, 1257, 1025. <sup>1</sup>H NMR (500 MHz, CDCl<sub>3</sub>, 25 °C,  $\delta$ ): 7.75 (dt,  $J = 8.8, 2.5$  Hz, 2H), 7.58 (s, 1H), 7.33 (dd,  $J = 8.5, 1.4$  Hz, 1H), 7.28 (d,  $J = 8.5$  Hz, 1H), 6.79 (dt,  $J = 9.0, 2.5$  Hz, 2H), 4.31 (t,  $J = 4.7$  Hz, 2H), 4.24 (t,  $J = 4.7$  Hz, 2H), 3.85 (s, 3H). <sup>13</sup>C{<sup>1</sup>H} NMR (126 MHz, CDCl<sub>3</sub>, 25 °C,  $\delta$ ): 161.0, 156.2, 141.3, 136.7, 131.9, 124.8 (q,  $J = 33$  Hz), 124.7 (q,  $J = 278$  Hz), 120.8, 119.6, 116.1, 113.9, 110.1, 60.5, 55.3, 47.4. HRMS (ESI-TOF)  $m/z$ : [M+H]<sup>+</sup> calcd for C<sub>17</sub>H<sub>16</sub>F<sub>3</sub>N<sub>2</sub>O<sub>2</sub>, 337.1158; found, 337.1158.

#### 4. Optimization of Reaction Condition

The solvent effect on the flavin-catalyzed reaction of **1a** with **2a** was investigated as shown in Table S1.

**Table S1.** Solvent effect.

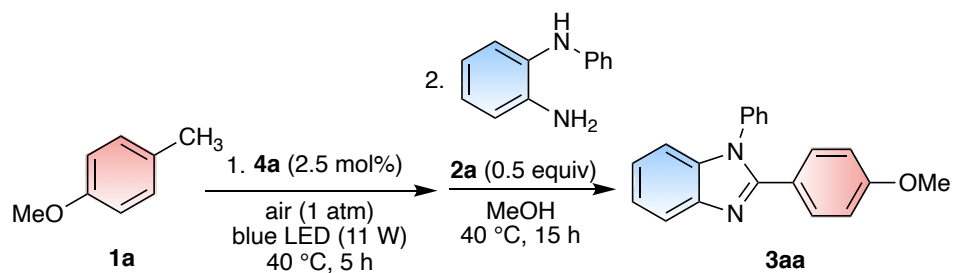

| entry | solvent (v/v)                | yield (%) | entry | solvent (v/v)                             | yield (%) |
|-------|------------------------------|-----------|-------|-------------------------------------------|-----------|
| 1     | MeOH                         | trace     | 7     | THF/H <sub>2</sub> O (1:1)                | 2         |
| 2     | MeOH/H <sub>2</sub> O (99:1) | 9         | 8     | CHCl <sub>3</sub> /H <sub>2</sub> O (1:1) | 2         |
| 3     | MeOH/H <sub>2</sub> O (9:1)  | 19        | 9     | DMF/H <sub>2</sub> O (1:1)                | 28        |
| 4     | MeOH/H <sub>2</sub> O (4:1)  | 36        | 10    | CH <sub>3</sub> CN/H <sub>2</sub> O (1:1) | 25        |
| 5     | MeOH/H <sub>2</sub> O (1:1)  | 64        | 11    | MeOH/H <sub>2</sub> O (1:1)               | 64        |
| 6     | MeOH/H <sub>2</sub> O (1:2)  | 51        | 12    | <i>t</i> -BuOH/H <sub>2</sub> O (1:1)     | 56        |

Reaction Conditions: a mixture of **1a** (0.05 M) and **4a** (2.5 mol%) in solvent was placed under irradiation with blue LED lamps (11 W) while stirring under air (1 atm, balloon) at 40 °C for 5 h. A solution of **2a** in MeOH (0.025 M) was then added into the reaction mixture, and the mixture was stirred under irradiation at 40 °C for 15 h. Yield was determined by GC using biphenyl as an internal standard.

## 5. ESI-MS Analysis of Reaction Mixture

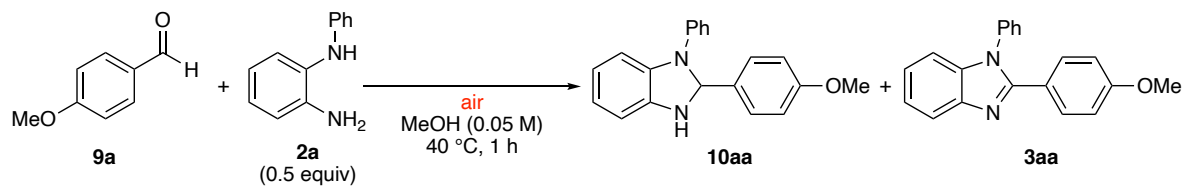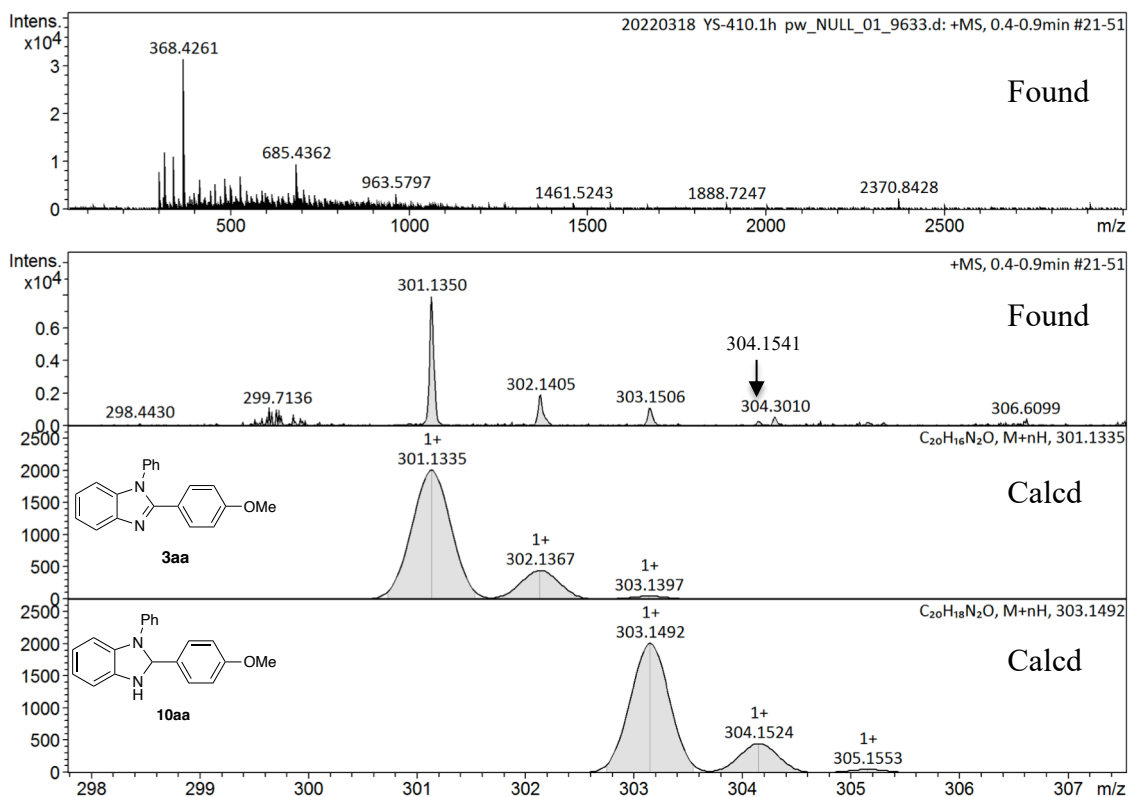

Figure S1. ESI-TOF mass spectra of the reaction mixture.

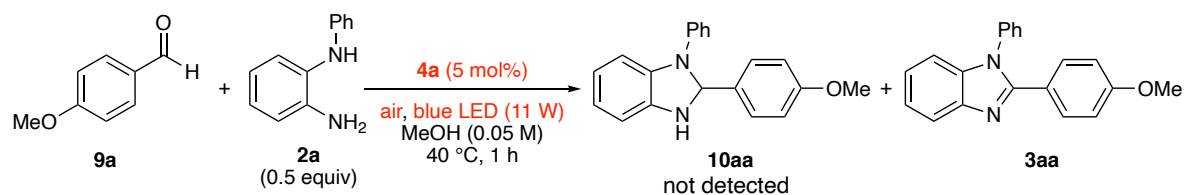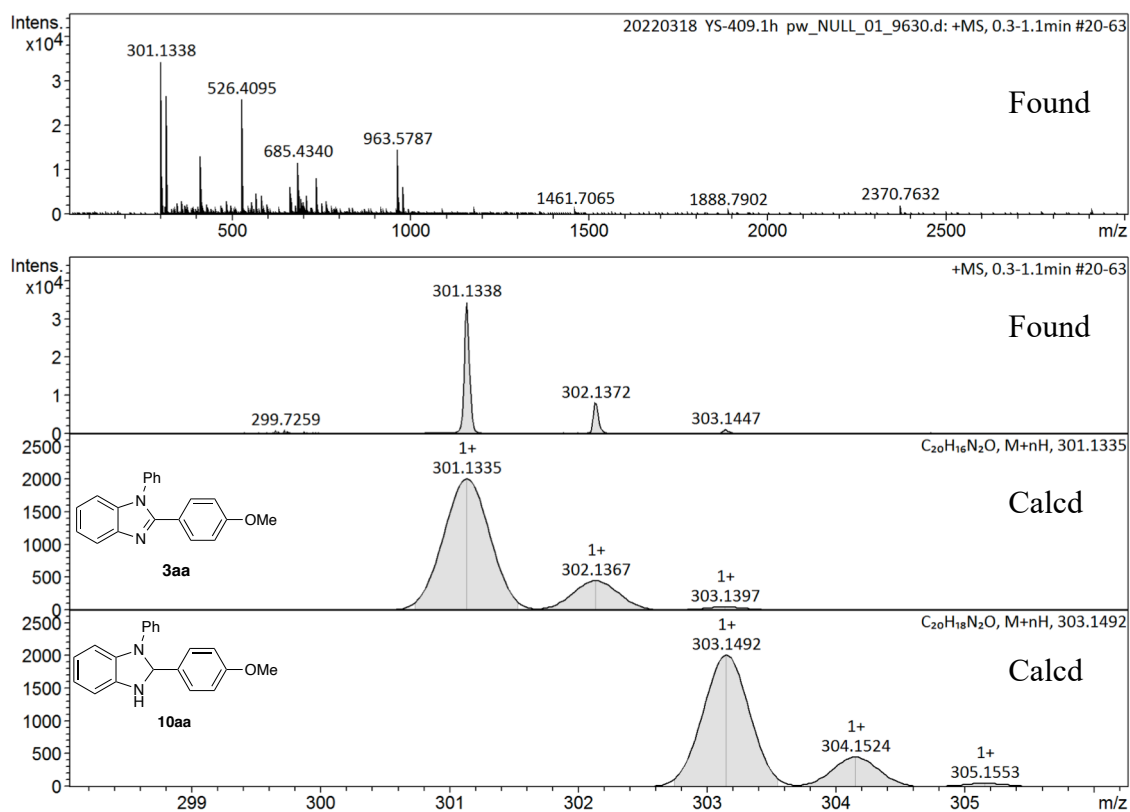

**Figure S2.** ESI-TOF mass spectra of the reaction mixture.

## 6. $^1\text{H}$ and $^{13}\text{C}\{^1\text{H}\}$ NMR Spectra of Novel Compounds

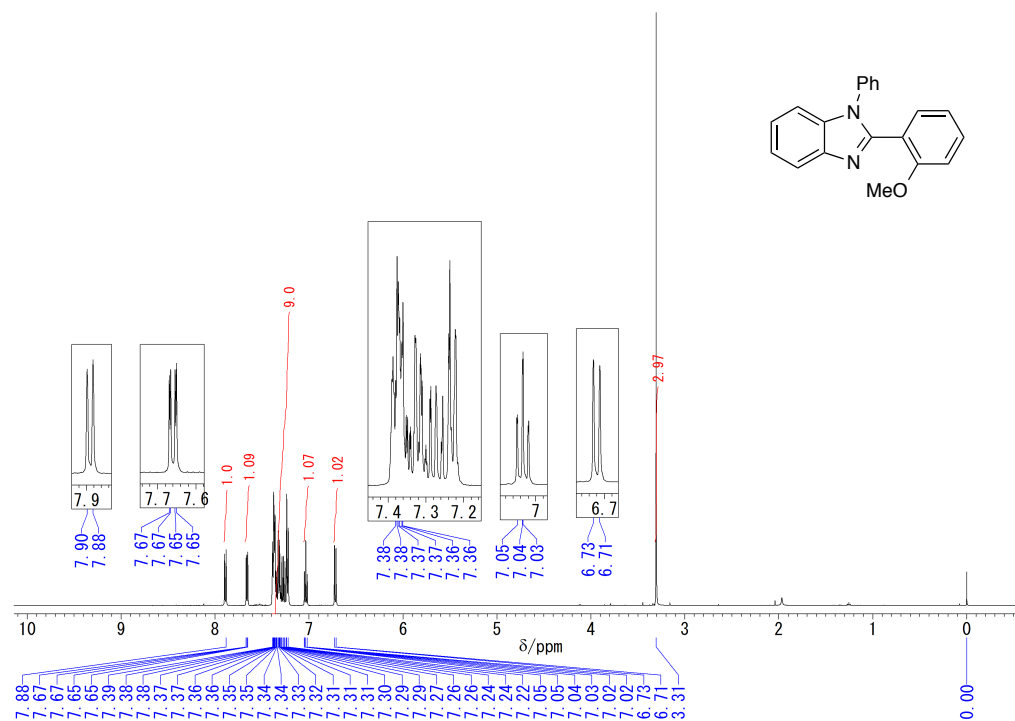

Spectrum S1.  $^1\text{H}$  NMR ( $\text{CDCl}_3$ , 500 MHz) spectrum of compound **3ba**.

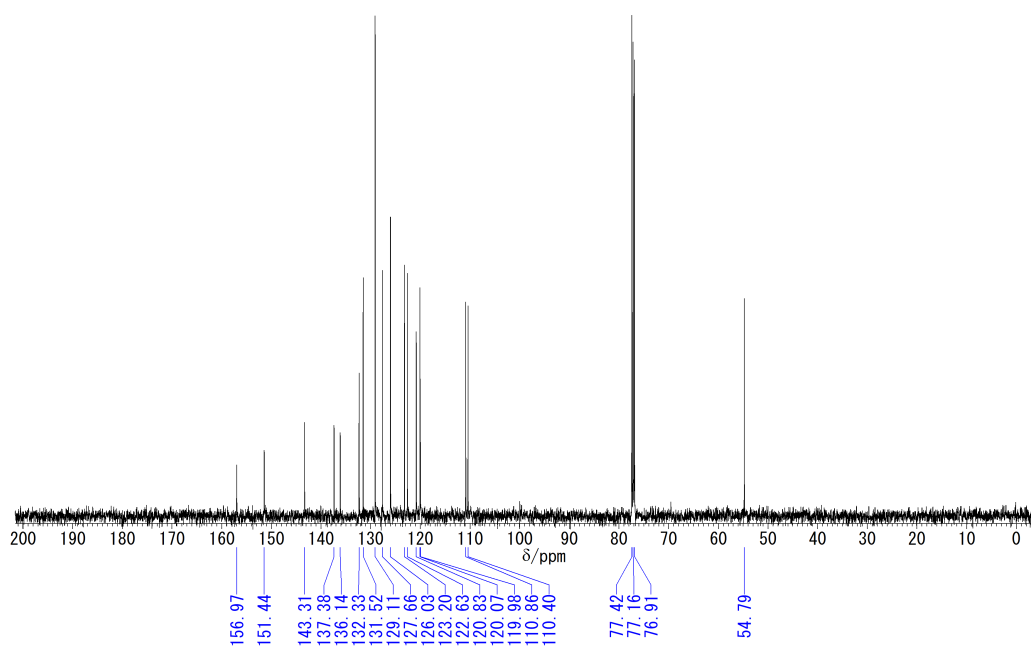

Spectrum S2.  $^{13}\text{C}\{^1\text{H}\}$  NMR ( $\text{CDCl}_3$ , 126 MHz) spectrum of compound **3ba**.

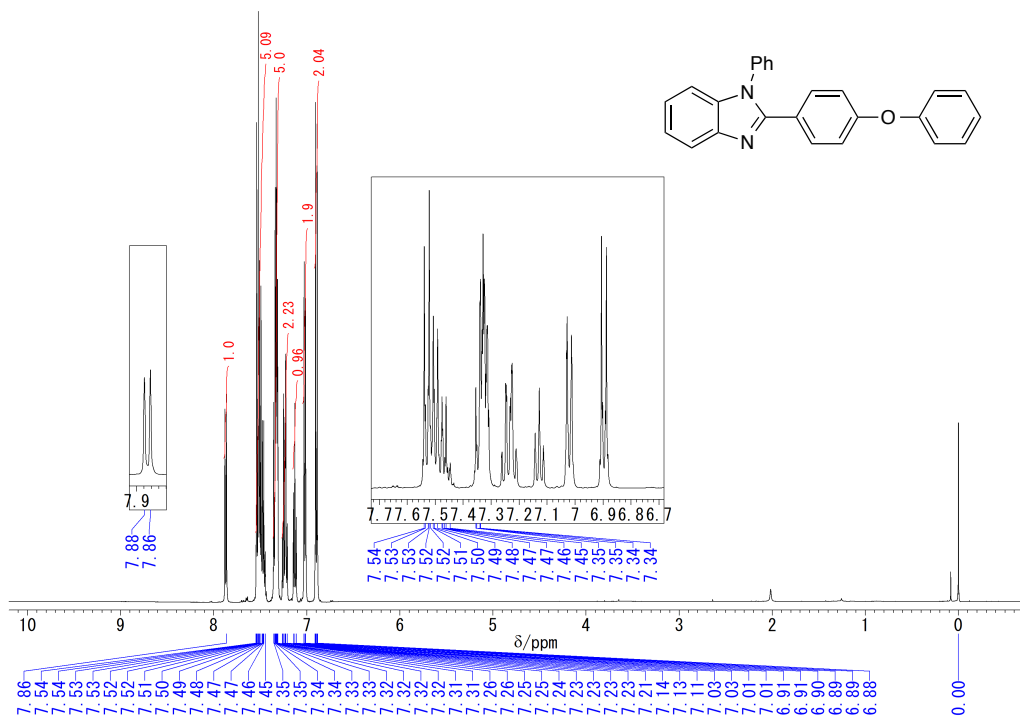

Spectrum S3. <sup>1</sup>H NMR (CDCl<sub>3</sub>, 500 MHz) spectrum of compound 3ca.

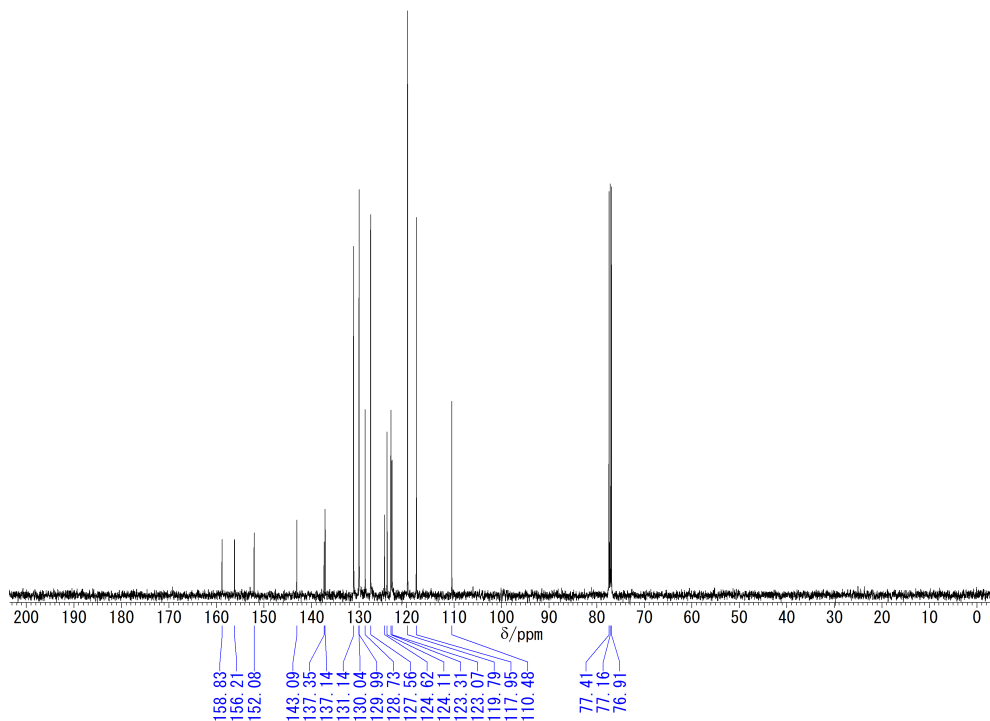

Spectrum S4. <sup>13</sup>C{<sup>1</sup>H} NMR (CDCl<sub>3</sub>, 126 MHz) spectrum of compound 3ca.

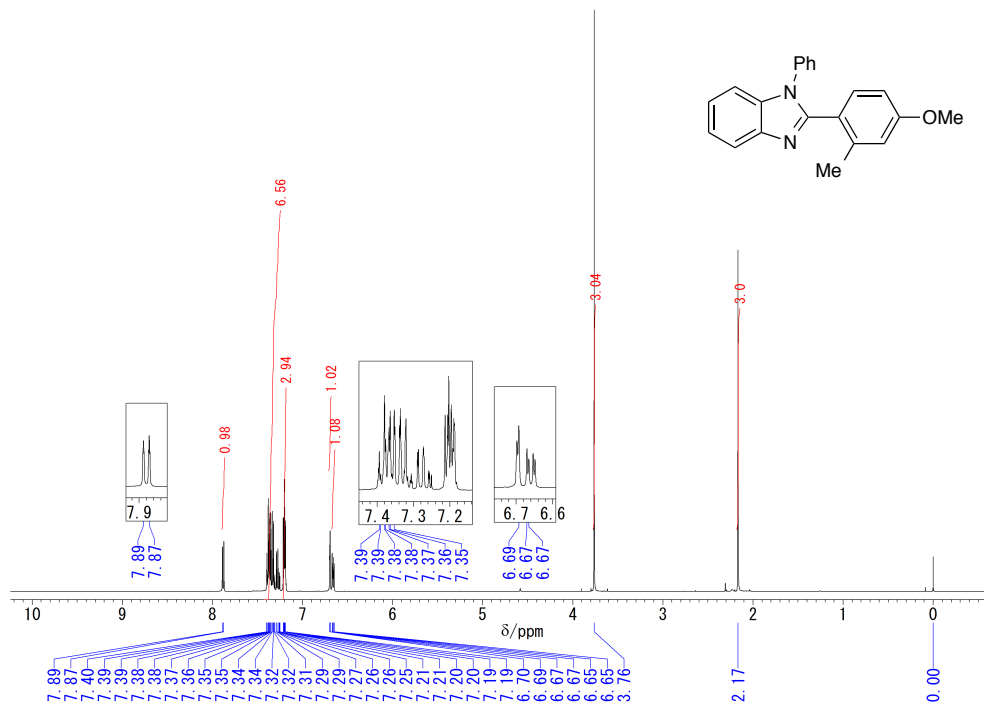

Spectrum S5. <sup>1</sup>H NMR (CDCl<sub>3</sub>, 500 MHz) spectrum of compound **3ga**.

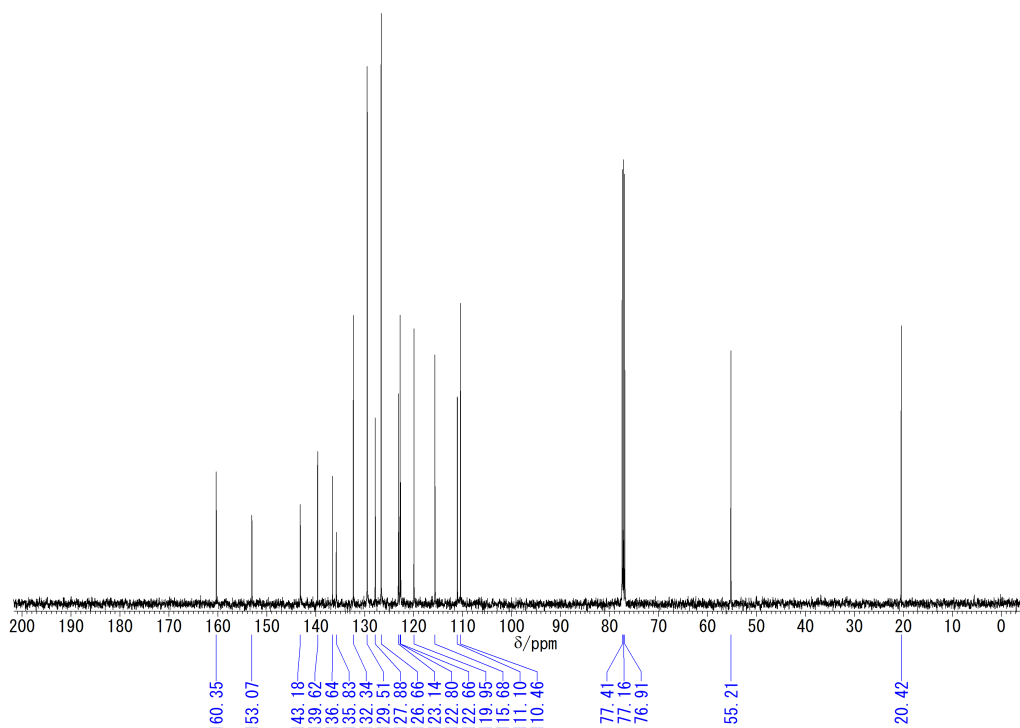

Spectrum S6. <sup>13</sup>C{<sup>1</sup>H} NMR (CDCl<sub>3</sub>, 126 MHz) spectrum of compound **3ga**.

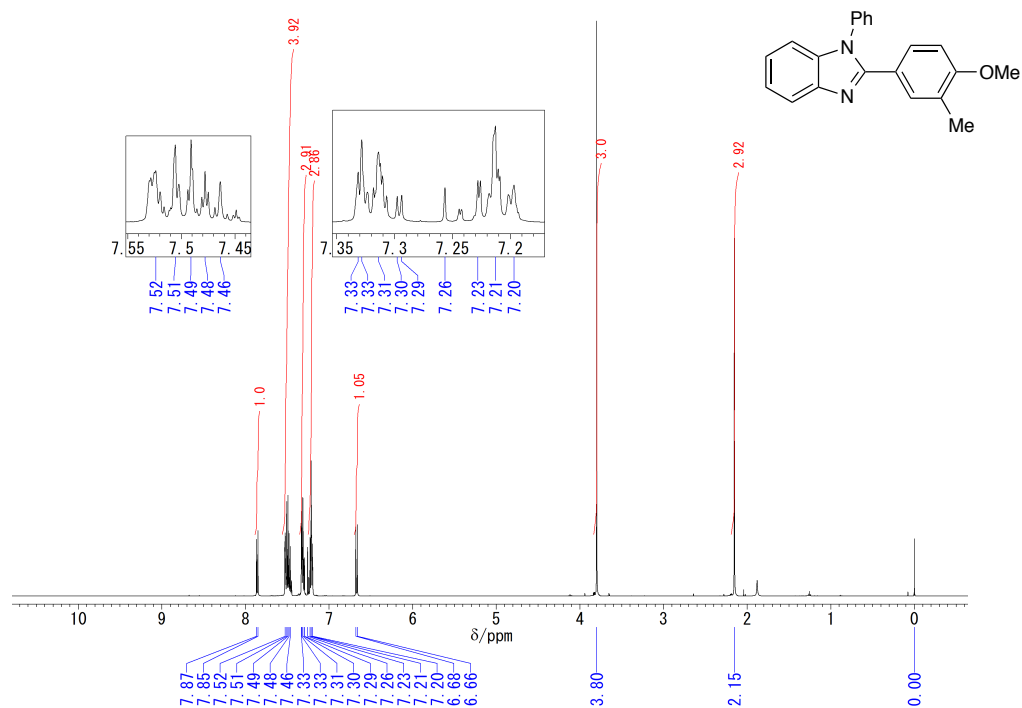

**Spectrum S7.**  $^1\text{H}$  NMR ( $\text{CDCl}_3$ , 500 MHz) spectrum of compound **3ha**.

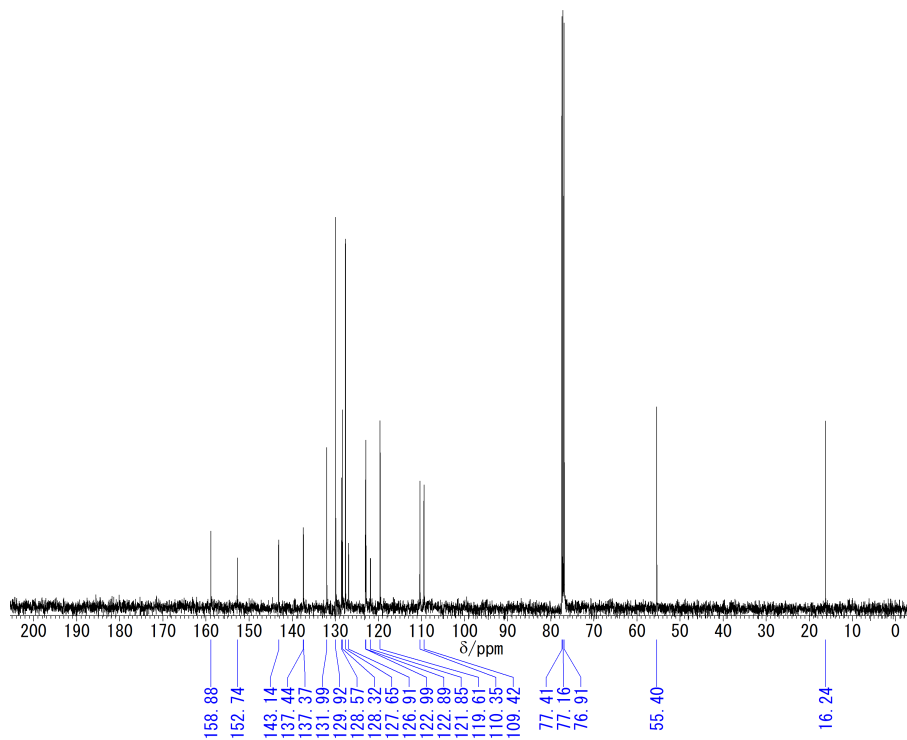

**Spectrum S8.**  $^{13}\text{C}\{^1\text{H}\}$  NMR ( $\text{CDCl}_3$ , 126 MHz) spectrum of compound **3ha**.



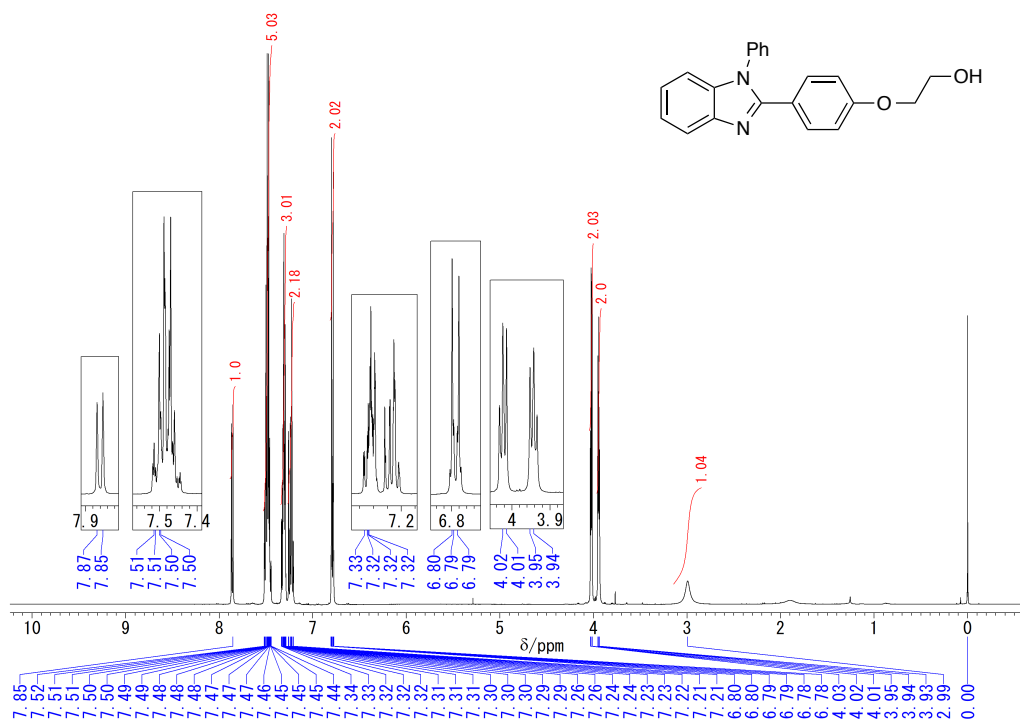

**Spectrum S9.** <sup>1</sup>H NMR (CDCl<sub>3</sub>, 500 MHz) spectrum of compound **3ia**.

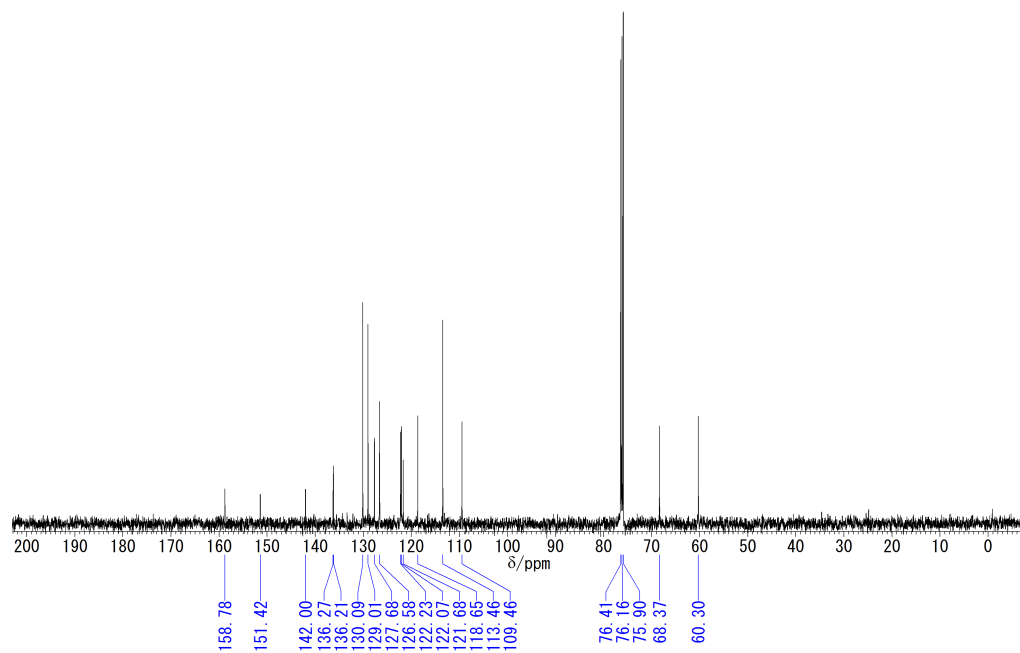

**Spectrum S10.** <sup>13</sup>C {<sup>1</sup>H} NMR (CDCl<sub>3</sub>, 126 MHz) spectrum of compound **3ia**.

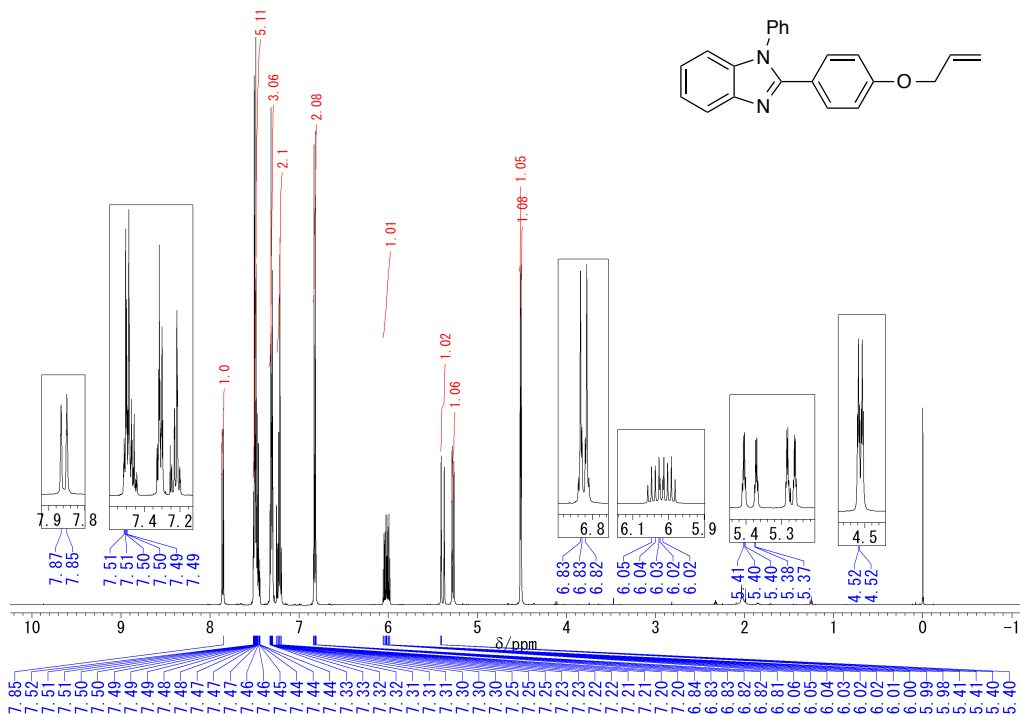

Spectrum S11. <sup>1</sup>H NMR (CDCl<sub>3</sub>, 500 MHz) spectrum of compound **3ja**.

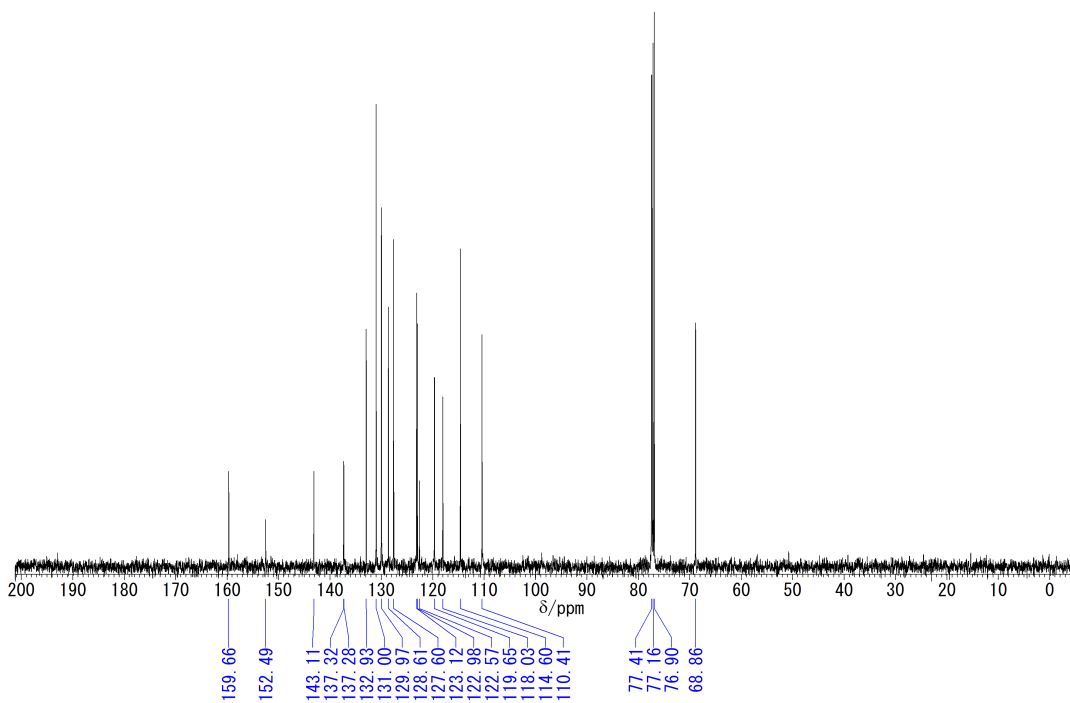

Spectrum S12. <sup>13</sup>C{<sup>1</sup>H} NMR (CDCl<sub>3</sub>, 126 MHz) spectrum of compound **3ja**.

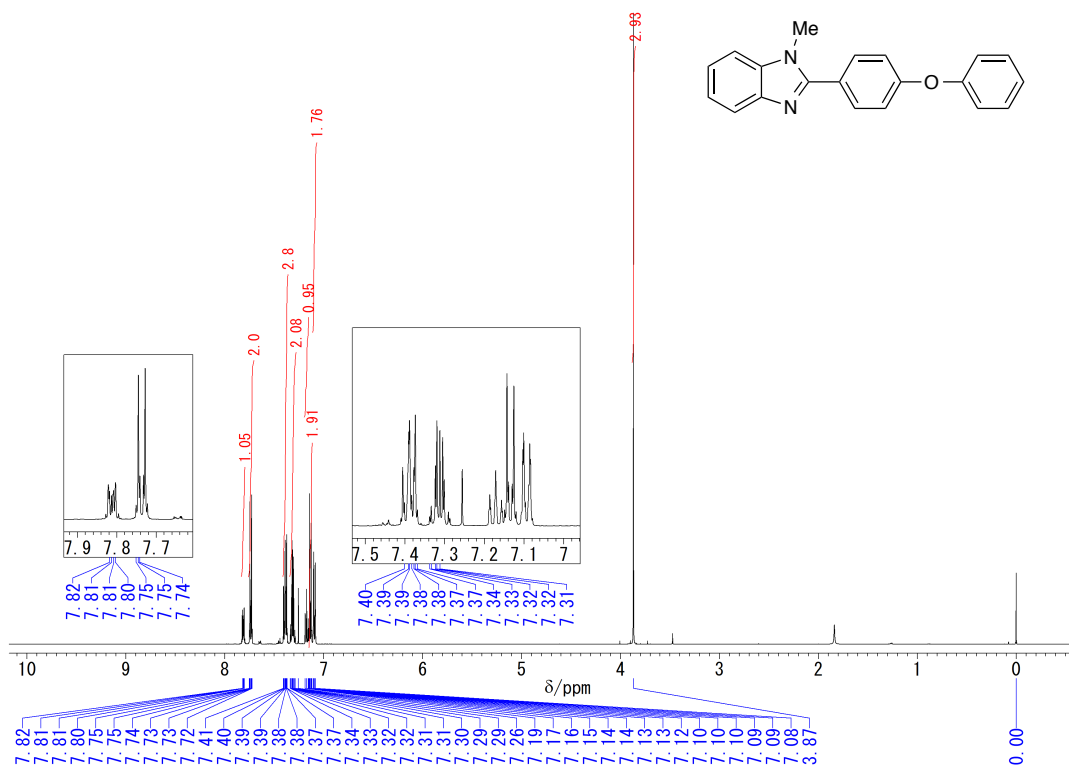

Spectrum S13. <sup>1</sup>H NMR (CDCl<sub>3</sub>, 500 MHz) spectrum of compound **3cb**.

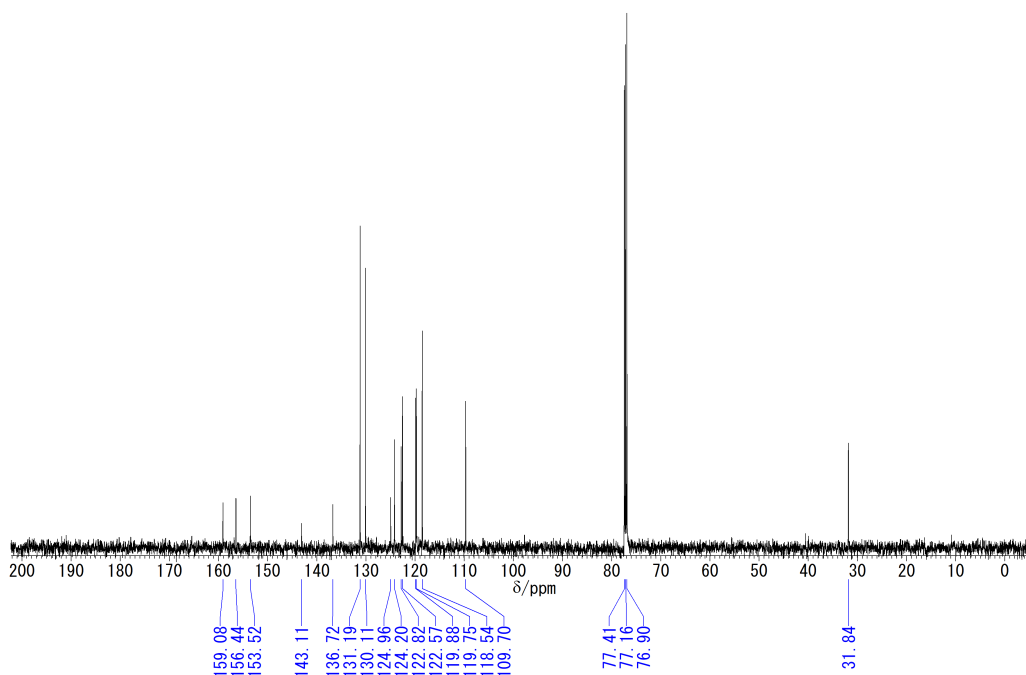

Spectrum S14. <sup>13</sup>C{<sup>1</sup>H} NMR (CDCl<sub>3</sub>, 126 MHz) spectrum of compound **3cb**.

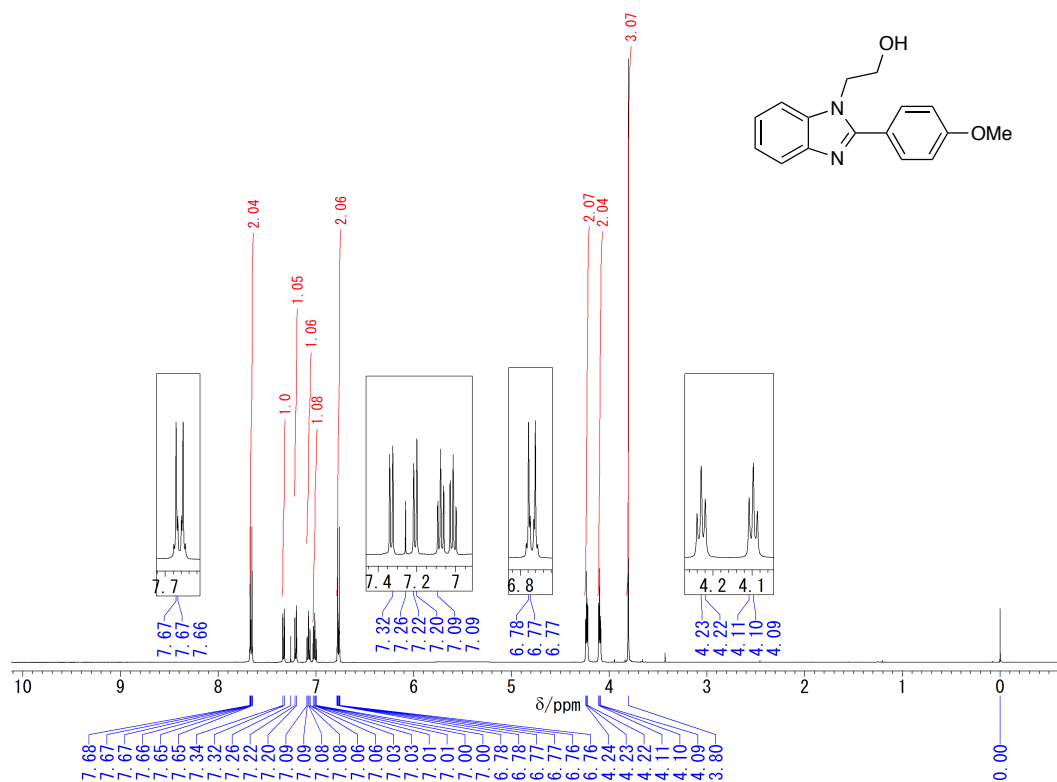

Spectrum S15. <sup>1</sup>H NMR (CDCl<sub>3</sub>, 500 MHz) spectrum of compound 3ac.

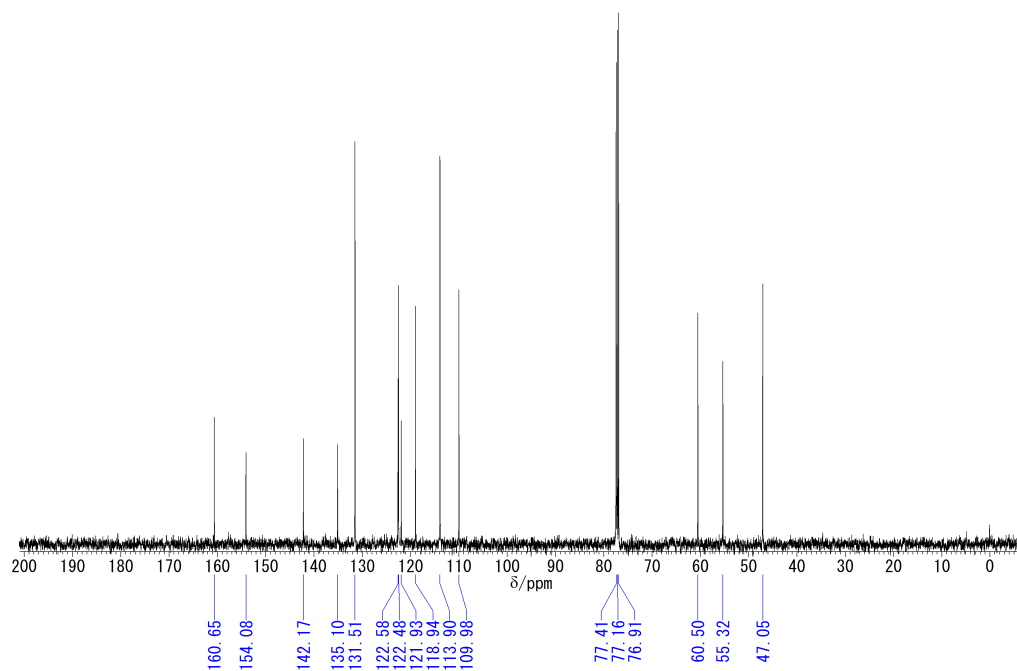

Spectrum S16. <sup>13</sup>C{<sup>1</sup>H} NMR (CDCl<sub>3</sub>, 126 MHz) spectrum of compound 3ac.

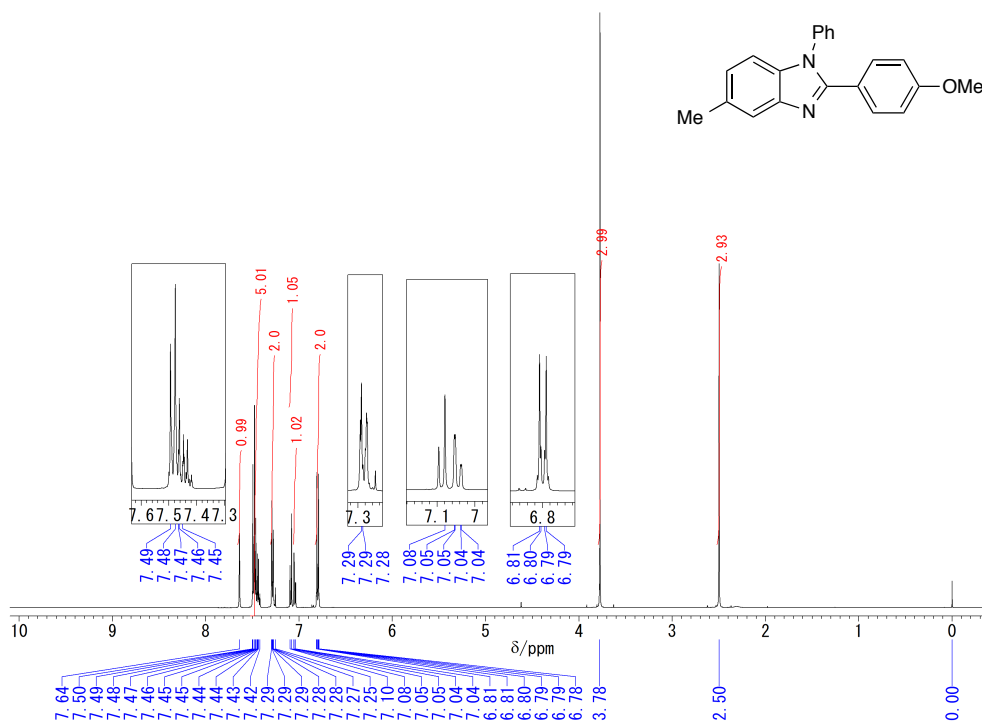

Spectrum S17. <sup>1</sup>H NMR (CDCl<sub>3</sub>, 500 MHz) spectrum of compound **3af**.

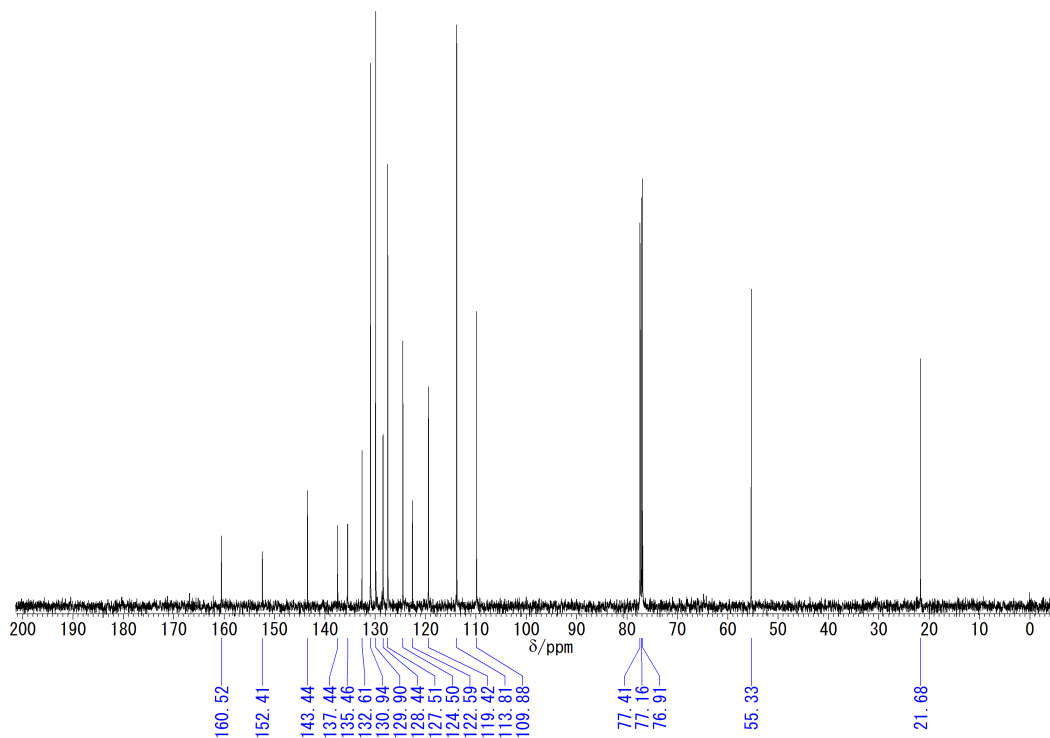

Spectrum S18. <sup>13</sup>C{<sup>1</sup>H} NMR (CDCl<sub>3</sub>, 126 MHz) spectrum of compound **3af**.

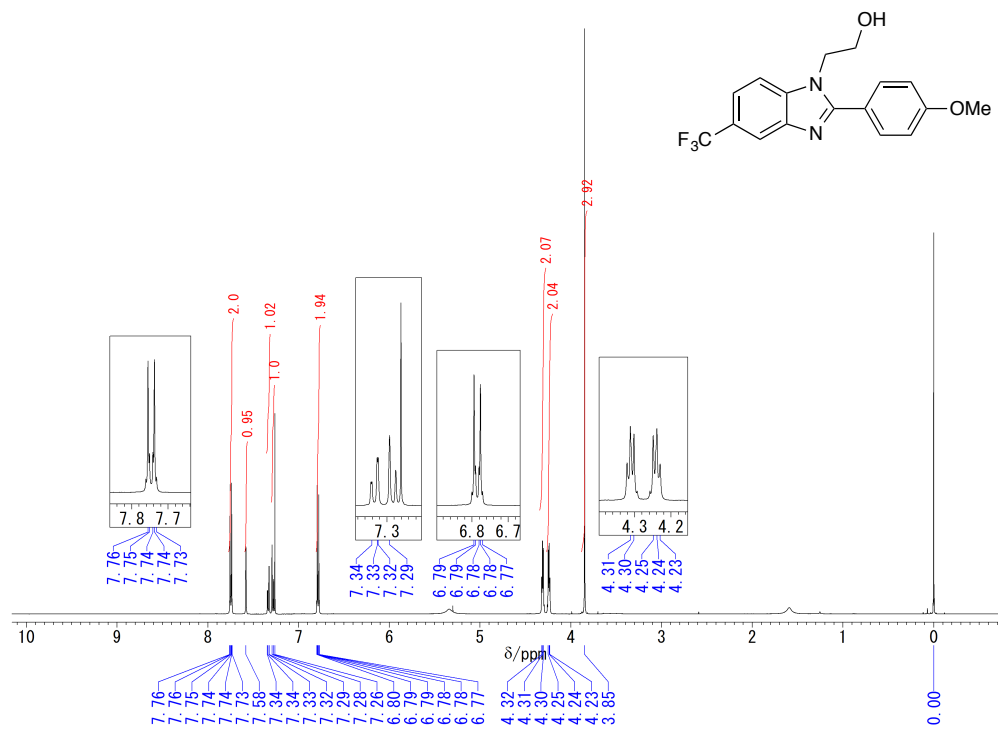

**Spectrum S19.** <sup>1</sup>H NMR (CDCl<sub>3</sub>, 500 MHz) spectrum of compound **3ah**.

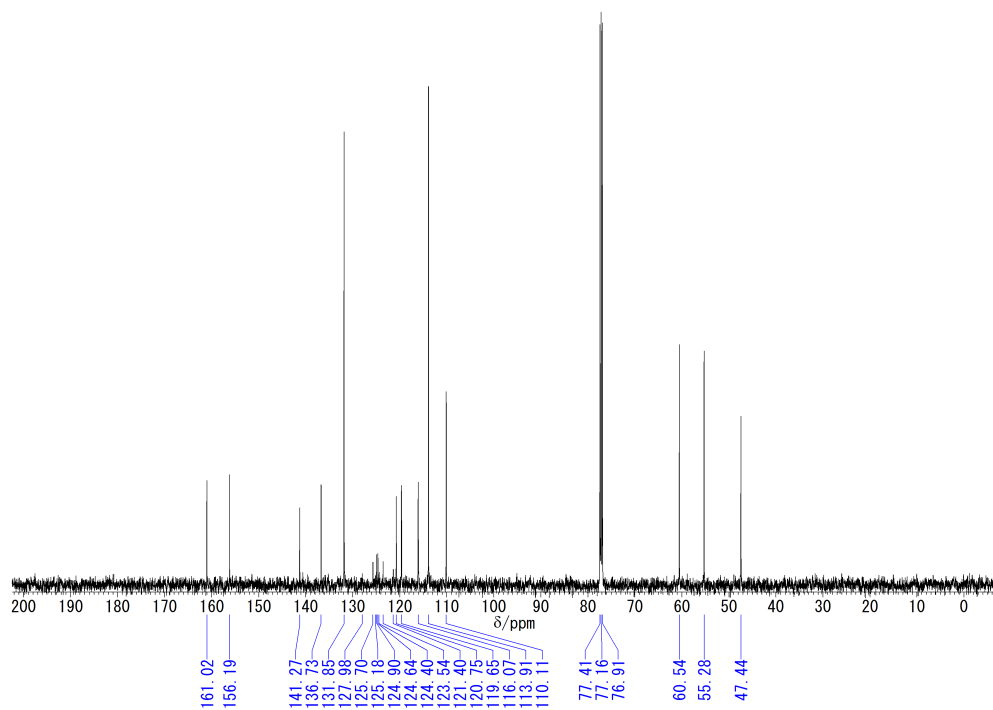

**Spectrum S20.** <sup>13</sup>C{<sup>1</sup>H} NMR (CDCl<sub>3</sub>, 126 MHz) spectrum of compound **3ah**.

## 7. <sup>1</sup>H NMR Spectra of Known Compounds

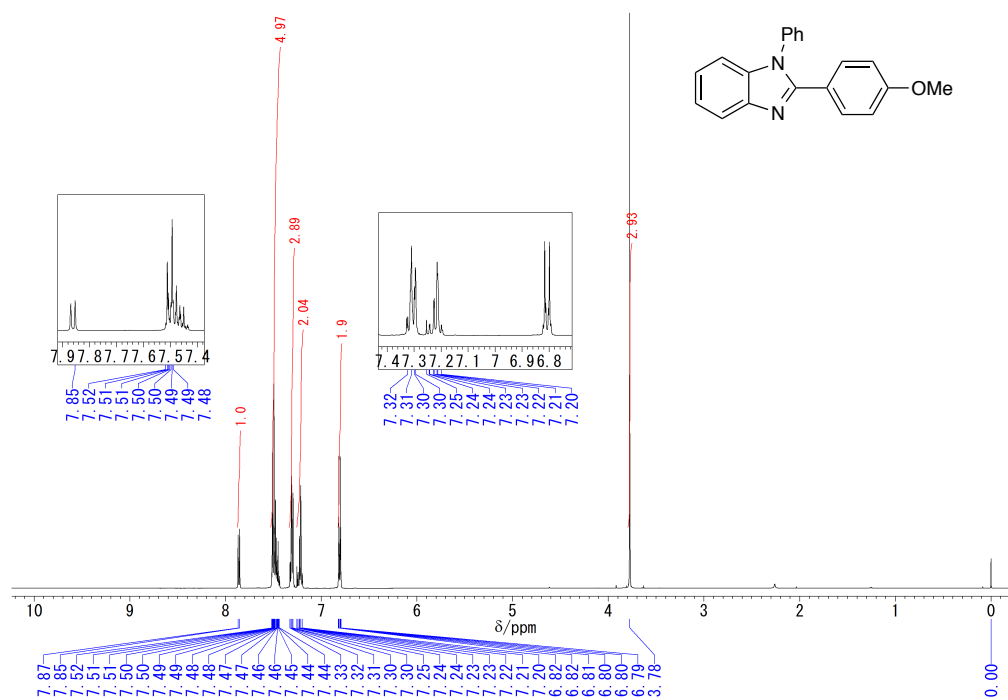

Spectrum S21. <sup>1</sup>H NMR (CDCl<sub>3</sub>, 500 MHz) spectrum of compound **3aa**.

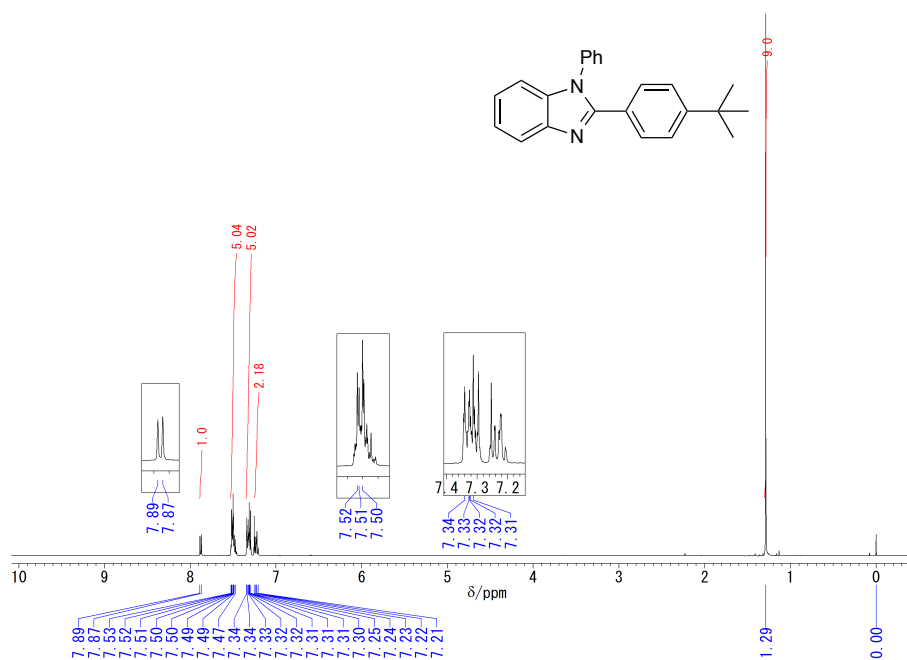

Spectrum S22. <sup>1</sup>H NMR (CDCl<sub>3</sub>, 500 MHz) spectrum of compound **3da**.

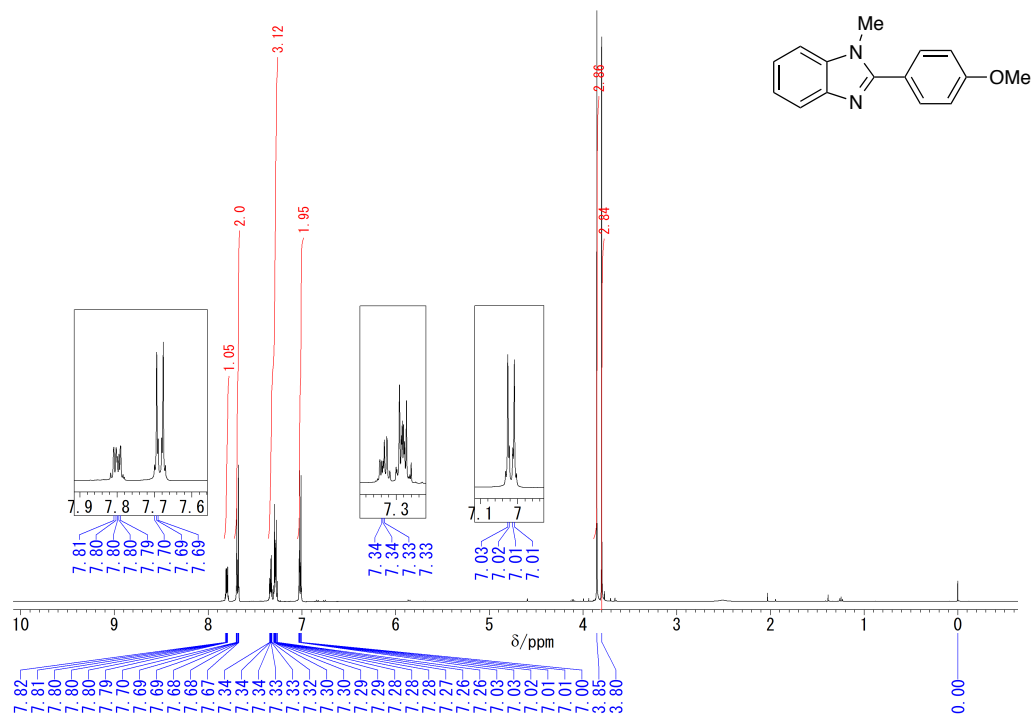

**Spectrum S23.** <sup>1</sup>H NMR (CDCl<sub>3</sub>, 500 MHz) spectrum of compound **3ab**.

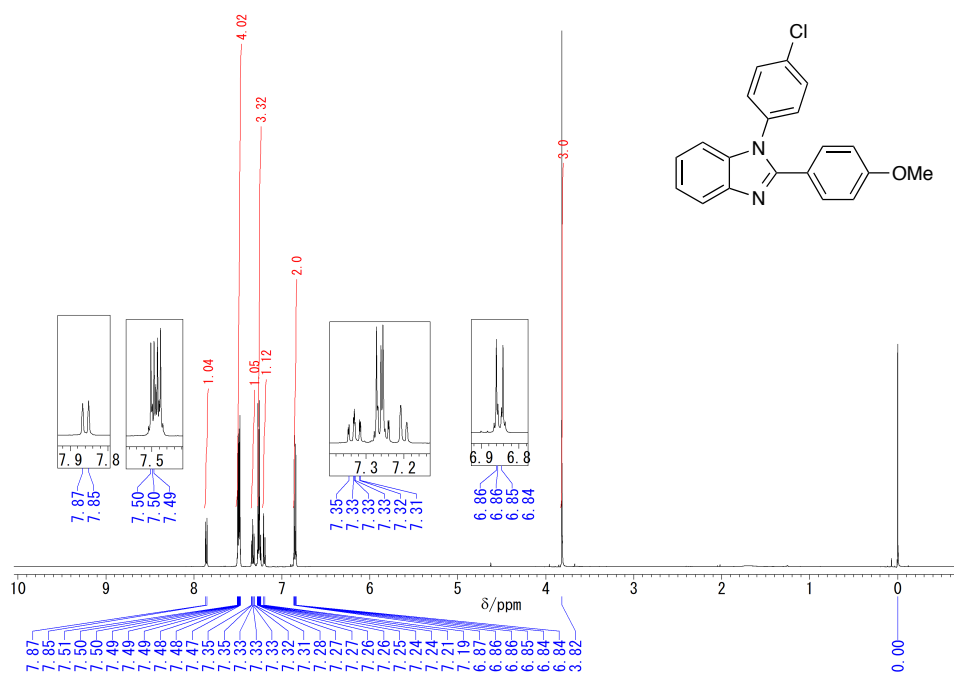

**Spectrum S24.** <sup>1</sup>H NMR (CDCl<sub>3</sub>, 500 MHz) spectrum of compound **3ad**.



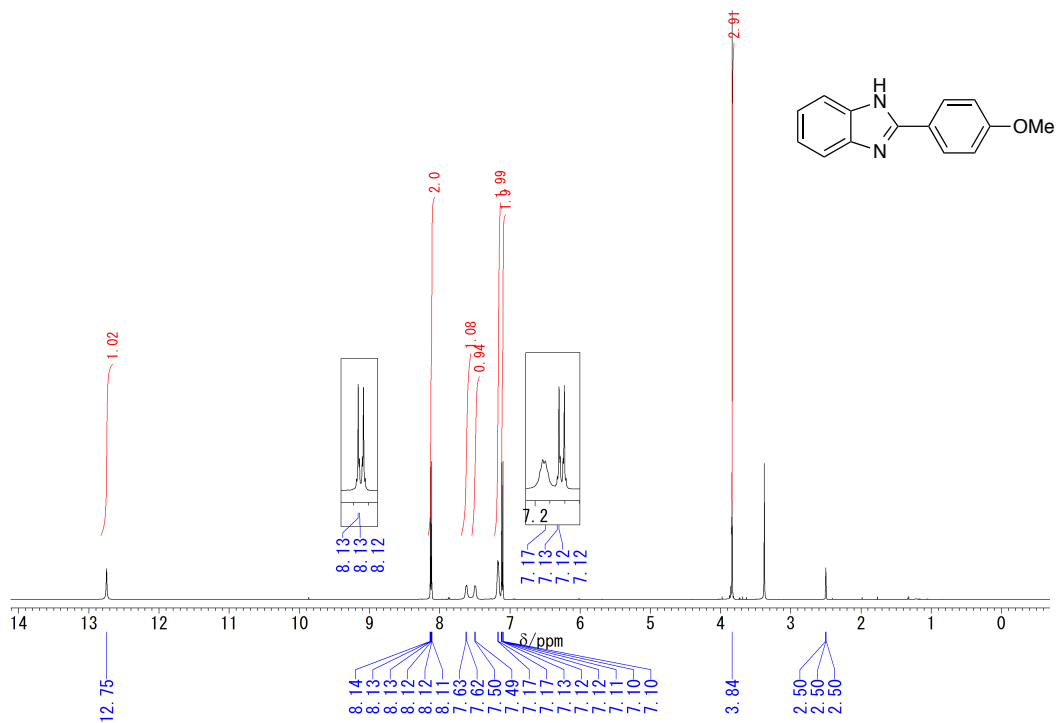

**Spectrum S25.**  $^1\text{H}$  NMR ( $\text{DMSO-d}_6$ , 500 MHz) spectrum of compound **3ae**.

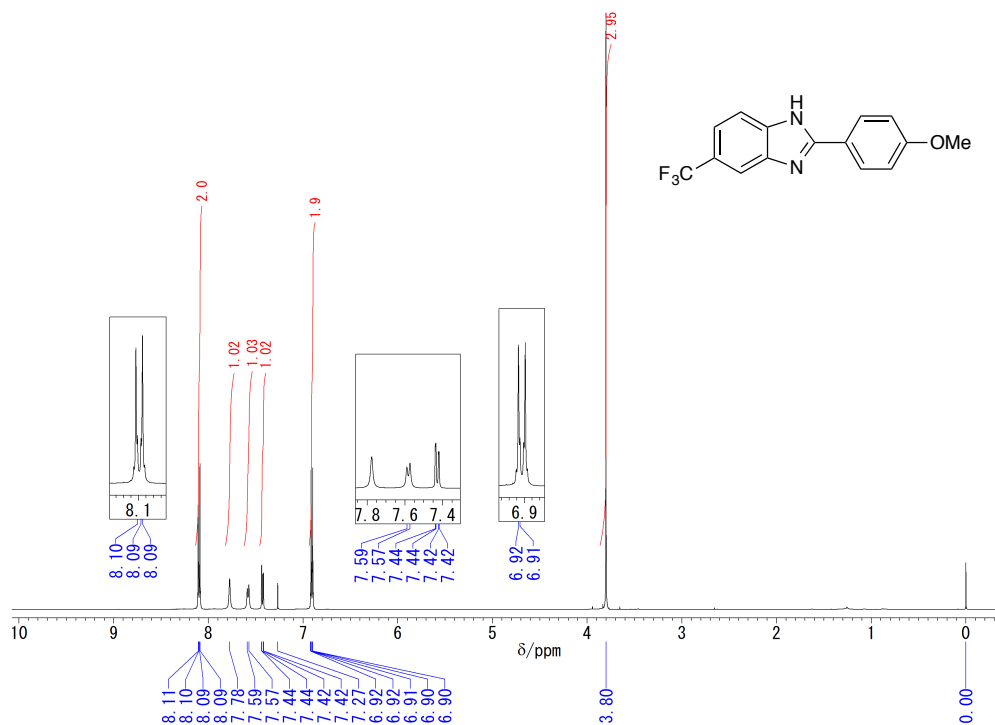

**Spectrum S26.**  $^1\text{H}$  NMR ( $\text{CDCl}_3$ , 500 MHz) spectrum of compound **3ag**.

## 8. References

- (S1) A. Takeda, H. Okai, K. Watabe and H. Iida, *J. Org. Chem.*, 2022, **87**, 10372-10376.
- (S2) P. Ménová, H. Dvořáková, V. Eigner, J. Ludvík and R. Cibulka, *Adv. Synth. Catal.* 2013, **355**, 3451-3462.
- (S3) T. Sakai, T. Kumoi, T. Ishikawa, T. Nitta and H. Iida, *Org. Biomol. Chem.*, 2018, **16**, 3999-4007.
- (S4) S. Yang, C. Wu, M. Ruan, Y. Yang, Y. Zhao, J. Niu, W. Yang and J. Xu, *Tetrahedron Lett.*, 2012, **53**, 4288-4292.
- (S5) a) S.-L. Qi, Y. Li, J.-F. Li, T. Zhang, Y.-X. Luan and M. Ye, *Org. Lett.*, 2021, **23**, 4034-4039. b) W.-S. Li, N. Zhang and L. M. Sayre, *Tetrahedron*, 2001, **57**, 4507-4522.
- (S6) J. Jayabharathi, V. Thanikachalam and K. Jayamoorthy, *Photochem. Photobiol. Sci.*, 2013, **12**, 1761-1773.
- (S7) K. M. H. Nguyen and M. Largeton, *Chem. Eur. J.*, 2015, **21**, 12606-12610.
- (S8) X. Jin, Y. Liu, Q. Lu, D. Yang, J. Sun, S. Qin, J. Zhang, J. Shen, C. Chu and R. Liu, *Org. Biomol. Chem.*, 2013, **11**, 3776-3780.
- (S9) P. Roy and A. Pramanik, *Tetrahedron Lett.*, 2013, **54**, 5243-5245.
- (S10) O. Ravi, A. Shaikh, A. Upare, K. K. Singarapu and S. R. Bathela, *J. Org. Chem.*, 2017, **82**, 4422-4428.
- (S11) B. M. Savall and J. R. Fontimayor, *Tetrahedron Lett.*, 2008, **49**, 6667-6669.
